# Supplementary material for: Mesoscopically ordered organosilica and carbon–silica hybrids with uniform morphology by surfactant-assisted self-assembly of organo bis-silanetriols
Source: Royal Society of Chemistry journal article supplement (doi:10.1039/b516985b), 2006-01-01
Supplement: b516985b.pdf [file b516985b.pdf]

## Mesoscopically ordered organo-silica and carbon-silica hybrids with uniform morphology by surfactant-assisted self-assembly of organo bis-silanetriols

Jiebin Pang, Lu Yang, Douglas A. Loy, Huisheng Peng, Henry S. Ashbaugh, Joel Mague, C. Jeffrey Brinker, and Yunfeng Lu

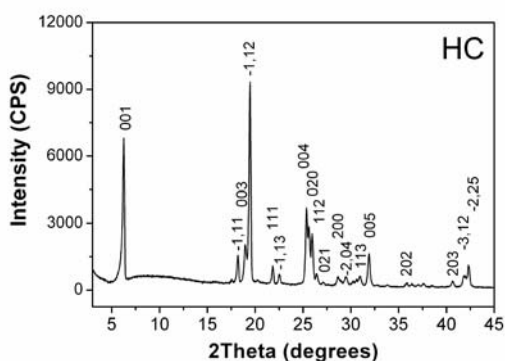

**Fig. S1** XRD pattern of the as-synthesized hybrid crystals HC. Recorded on a Siemens D500 diffractometer operating at 40 kV, 30 mA, Cu  $K_{\alpha}$  radiation,  $\lambda=0.15406$  nm.

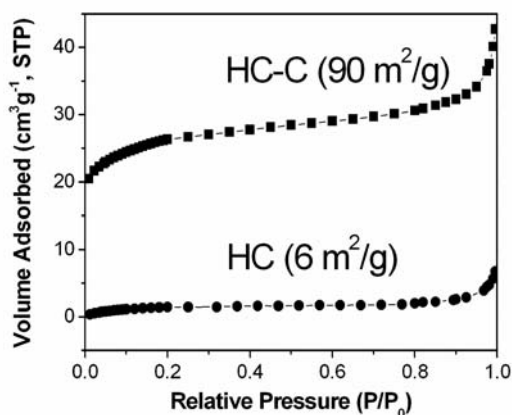

**Fig. S2** Nitrogen adsorption isotherms of the as-synthesized hybrid crystals HC, and carbonized hybrid HC-C. Measured at 77 K on a micromeritics ASAP 2010 analyzer.

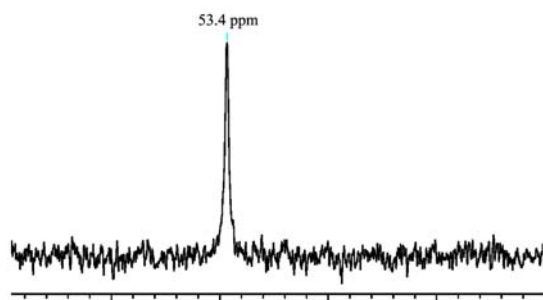

**Fig. S3**  $^{29}\text{Si}$  MAS NMR spectrum of the as-synthesized hybrid crystal HC. The single peak at -53.4 ppm corresponds to the uncondensed, completely-hydrolyzed silanetriols. Measured on a Varian Inova 400 spectrometer.

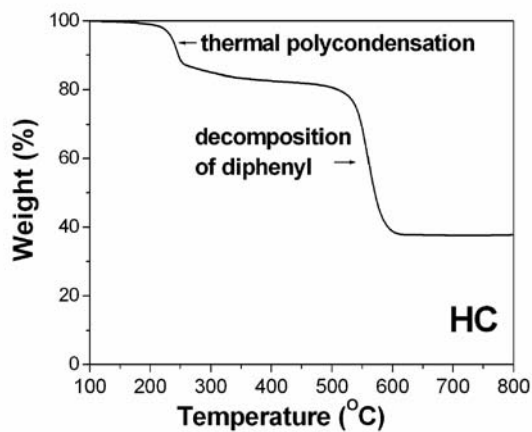

**Fig. S4** TGA curve of the as-synthesized hybrid crystals HC in oxygen performed on a TA Hi-Res TGA 2950 instrument.

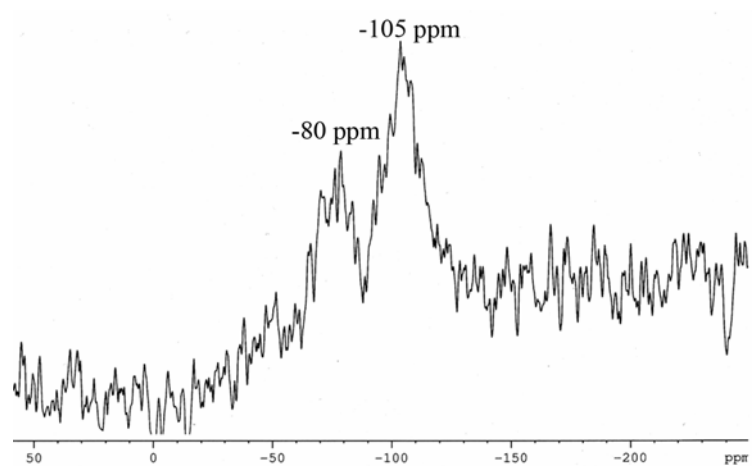

**Fig. S5** <sup>29</sup>Si MAS NMR of the carbonized particles. The chemical shifts at -80 and -105 ppm are assigned to T<sub>3</sub> Si and Q<sub>4</sub> Si, respectively. Measured on a Bruker ASX300 spectrometer.

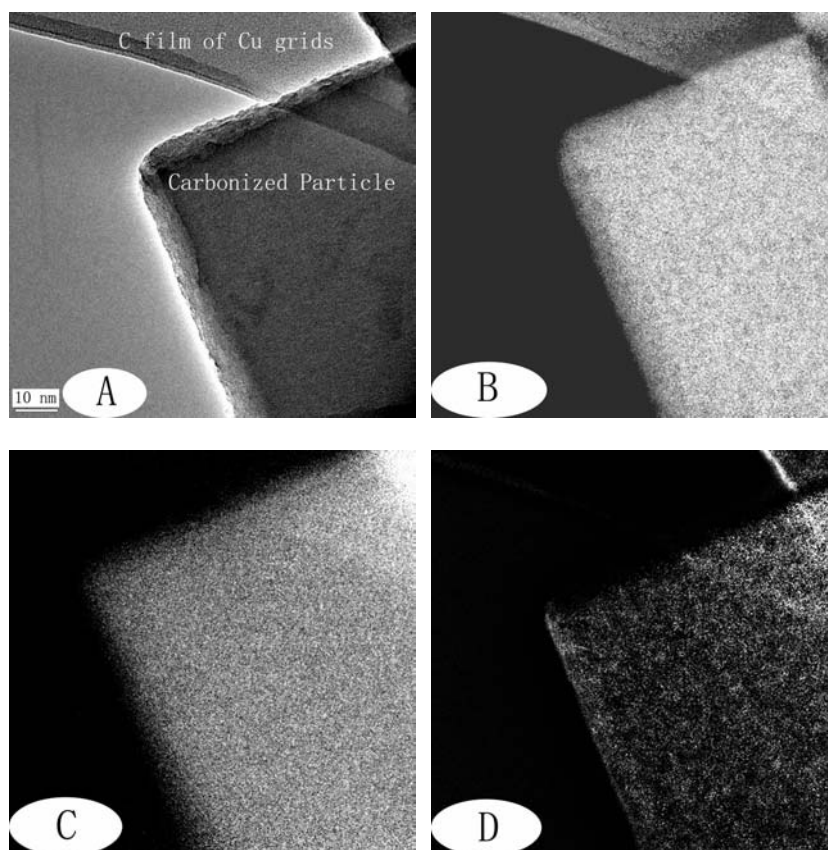

**Fig. S6** TEM image (A) and the corresponding EELS Carbon- (B), Oxygen- (C), and Silicon-mapping (D) images of the carbonized particles. Taken on a JEOL 2010F microscope operated at 200 kV.
